# Supplementary material
Source: PubMed Central journal article supplement (PMC5576346)
Supplement: NIHMS894189-supplement.pdf [file NIHMS894189-supplement.pdf]

## Supplementary Materials

### Human iPSC glial mouse chimeras reveal glial contributions to schizophrenia

Martha S. Windrem<sup>1</sup>, Mikhail Osipovitch<sup>2</sup>, Zhengshan Liu<sup>1</sup>, Janna Bates<sup>1</sup>, Devin Chandler-Militello<sup>1</sup>, Lisa Zou<sup>1</sup>, Jared Munir<sup>1</sup>, Steven Schanz<sup>1</sup>, Katherine McCoy<sup>1</sup>, Robert H. Miller<sup>3</sup>, Su Wang<sup>1</sup>, Maiken Nedergaard<sup>1,2</sup>, Robert L. Findling<sup>4</sup>, Paul J. Tesar<sup>5</sup>, Steven A. Goldman<sup>1,2\*</sup>

Correspondence to: [steven\\_goldman@urmc.rochester.edu](mailto:steven_goldman@urmc.rochester.edu) or [goldman@sund.ku.dk](mailto:goldman@sund.ku.dk)

#### This PDF file includes:

Figures S1 to S5

Tables S1 to S3

| Section                      |                                                                                                                                                      | Page no. |
|------------------------------|------------------------------------------------------------------------------------------------------------------------------------------------------|----------|
| <b>Supplementary Figures</b> |                                                                                                                                                      | 1-7      |
| <b>Figure S1</b>             | Flow cytometry reveals high-efficiency production of CD140a <sup>+</sup> /PDGF $\alpha$ R <sup>+</sup> hGPCs (related to <b>Figures 1, 4 and 5</b> ) | 2        |
| <b>Figure S2</b>             | Schizophrenia-derived GPCs exhibit aberrant dispersal in vivo (related to <b>Figure 2</b> )                                                          | 3        |
| <b>Figure S3</b>             | Heat map of genes differentially expressed by schizophrenic relative to control glial progenitor cells (related to <b>Figure 4</b> )                 | 4        |
| <b>Figure S4</b>             | Additional heat map of genes differentially expressed by SCZ relative to control glial progenitor cells (related to <b>Figure 4</b> )                | 5        |
| <b>Figure S5</b>             | Neurexin-1 expression was suppressed in SCZ hiPSC GPCs                                                                                               | 6        |
| <b>Supplementary Tables</b>  |                                                                                                                                                      |          |
| <b>Table S1</b>              | Patients and lines used in this study (related to <b>Figure 1</b> )                                                                                  | 7        |
| <b>Table S2</b>              | Significantly dysregulated genes in schizophrenic hGPCs (related to <b>Figure 4</b> )                                                                | 8        |
| <b>Table S3</b>              | Significantly dysregulated synaptic genes in SCZ GPCs (related to <b>Figure 5</b> )                                                                  | 11       |

## SUPPLEMENTARY FIGURES

Figure S1 (related to Figures 1, 2 and 4)

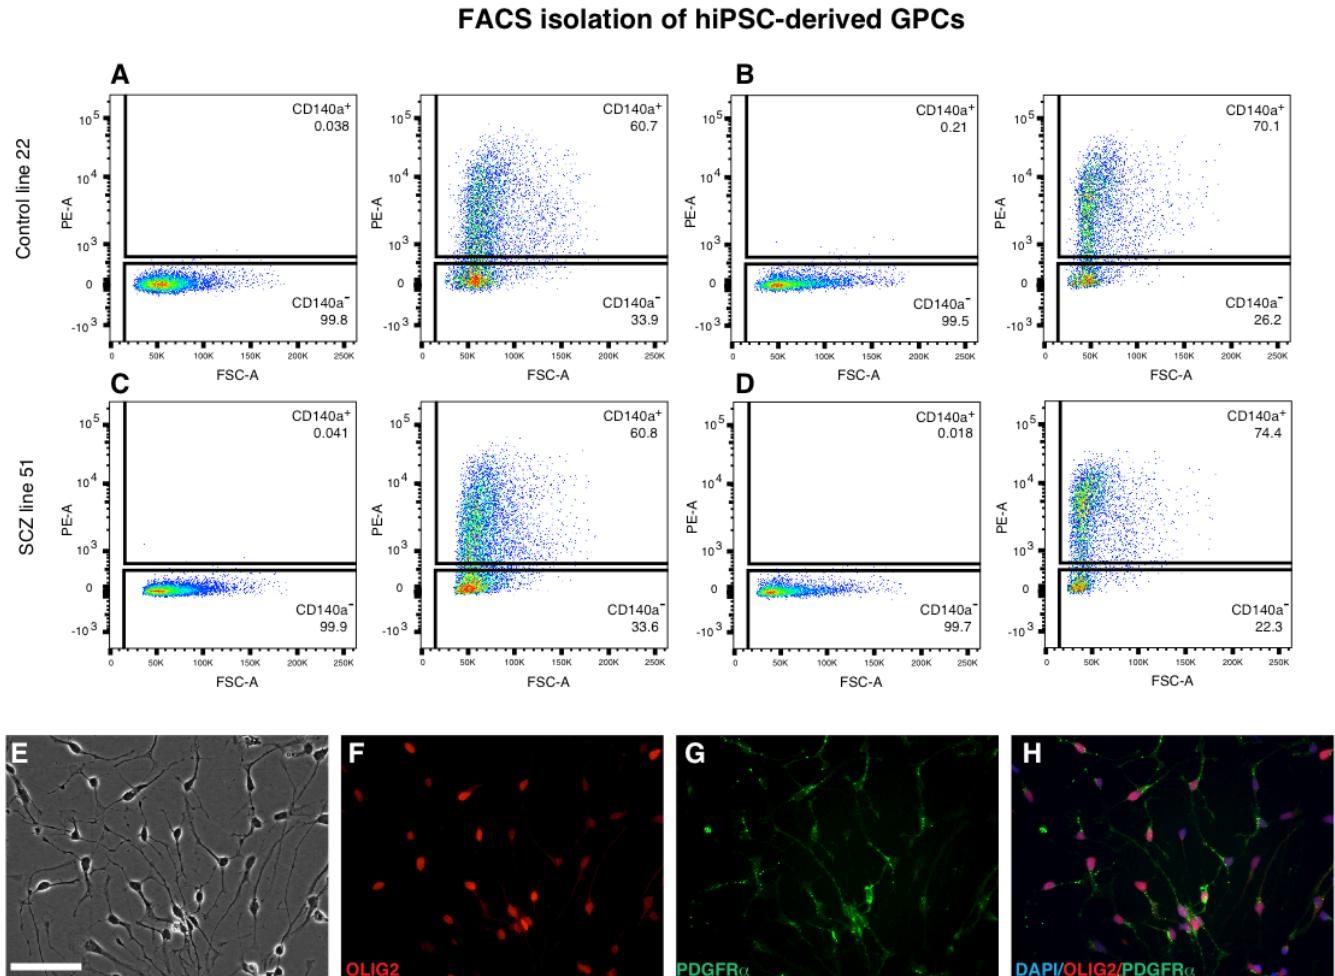

**Figure S1**

### **CD140a<sup>+</sup> glial progenitor cells could be efficiently produced from both SCZ and normal hiPSCs**

Flow cytometry for CD140a/PDGFR $\alpha$ <sup>+</sup> glial progenitor cells (*right plots, compared to unstained gating controls on left*), reveals dominant proportions of CD140a-defined cells in both normal control patient-derived (*top, A-B*) and SCZ-derived (*bottom, C-D*) preparations. **A-C** and **B-D** were run as matched pairs; **A** and **C**, 177 and 168 days in vitro (DIV); **B** and **D**, 188 and 196 DIV. **E-H** show a representative post-FACS preparation of CD140a-sorted cells, as **E**, a phase image, immunostained for both olig2 (**F**, red) and PDGFR $\alpha$  (**G**; **H**, merged). These plots were typical of GPC cultures of both normal and SCZ-derived hiPSC lines. The sorted populations were used for genomics assessment, while both sorted and unsorted cells were used for transplantation, with no evident performance differences between the two.

**Figure S2** (related to Figure 2)

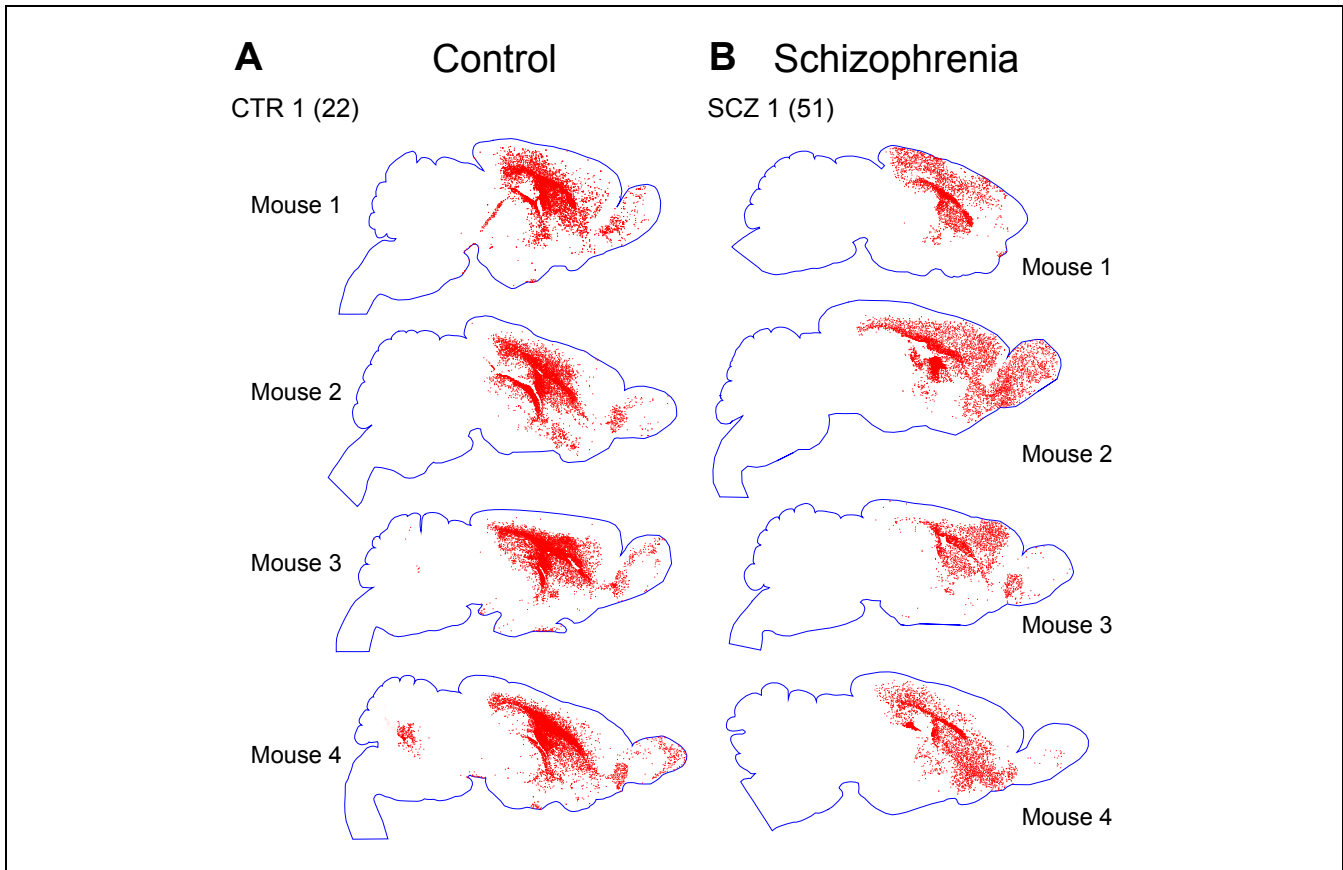

**Figure S2**

**Schizophrenia-derived GPCs exhibit aberrant dispersal in vivo**

The dispersal patterns of GPCs produced from SCZ patients typically differed from that of iPSC hGPCs derived from normal patients, in that SCZ GPCs did not remain and expand within the white matter before progressing to cortical infiltration, as was otherwise invariably the case with normal GPCs. A-B show 4 mice each implanted with either control subject-derived (line 22) or SCZ patient-derived (line 51) hGPCs. All SCZ hGPC-engrafted mice show disproportionate hGPC entry into the cortical and striatal gray matter, with less expansion and hence less net engraftment in the forebrain white matter tracts. This difference in hGPC dispersal pattern was noted consistently in all 4 SCZ lines assessed in vivo, each derived from a different patient, relative to their matched 4 control lines, similarly obtained from distinct patients (see **Figure 2**).

**Figure S3** (related to Figure 4)

**Heat maps of significantly dysregulated genes in schizophrenic relative to control hiPSC GPCs**

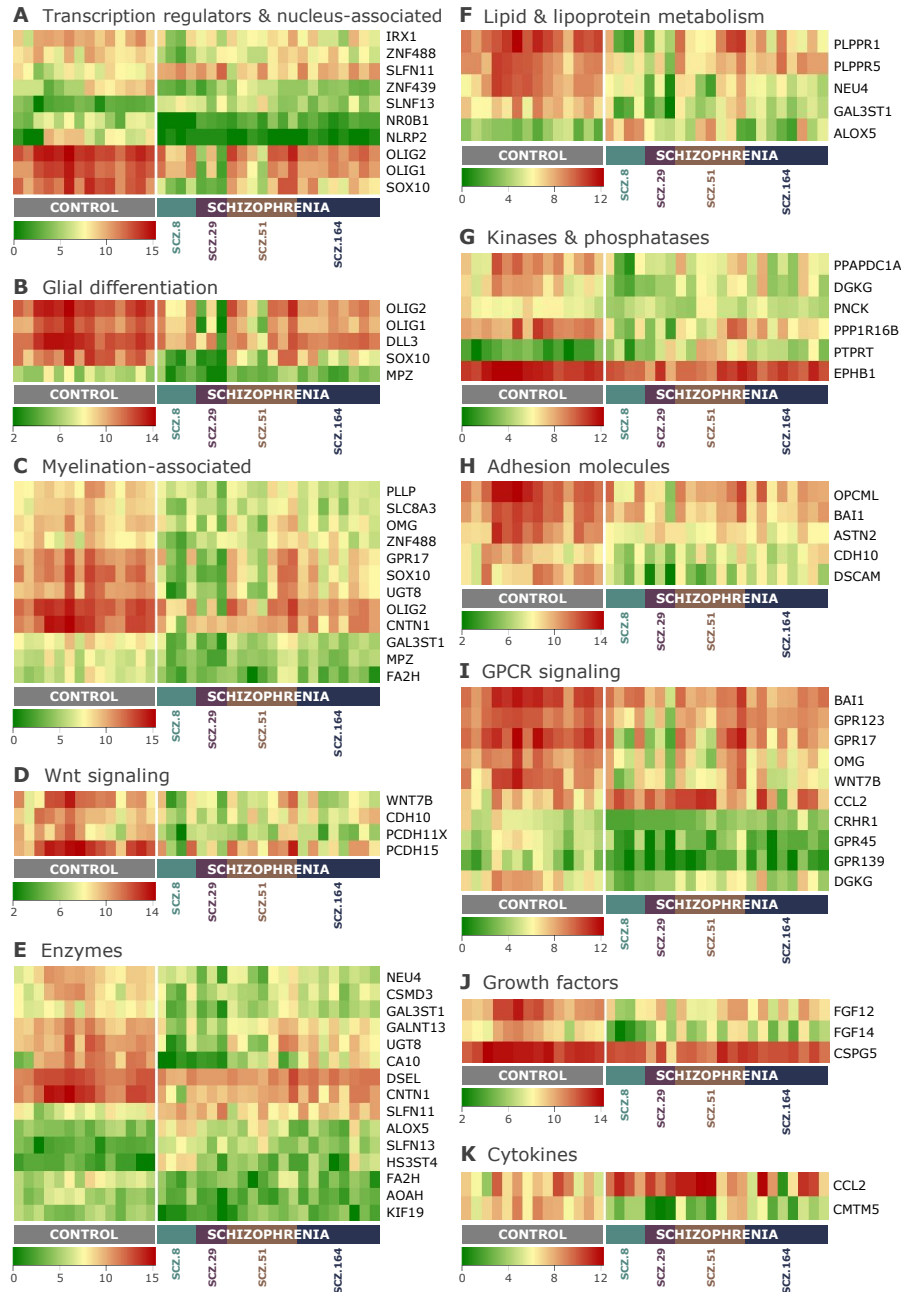

Expression patterns for shared genes differentially expressed by hiPSC GPCs derived from 4 schizophrenic patients, relative to the pooled gene expression pattern of hGPCs derived from 3 control-derived iPSCs (log<sub>2</sub> fold change >1.0, FDR 5%, 118 genes total). The dysregulated genes were manually annotated and grouped into relevant sets based on their function and cellular localization. Each heat map visualizes UQ-normalized, log<sub>2</sub>-transformed counts of genes grouped into the following functional categories, comprising genes encoding: **(A)** transcription regulators, zinc finger proteins, and other nucleus-associated proteins; **(B)** glial differentiation-associated proteins; **(C)** myelin-related genes and transcription factors; **(D)** Wnt pathway effectors; **(E)** metabolic enzymes; **(F)** lipid and lipoprotein metabolism; **(G)** kinases and phosphatases; **(H)** adhesion molecules, cadherins; and astrotactins; **(I)** GPCR signal intermediates; **(J)** growth factors; and **(K)** cytokines.

**Figure S4** (related to Figure 4)

**Additional heat maps of significantly dysregulated genes in SCZ relative to control hGPCs**

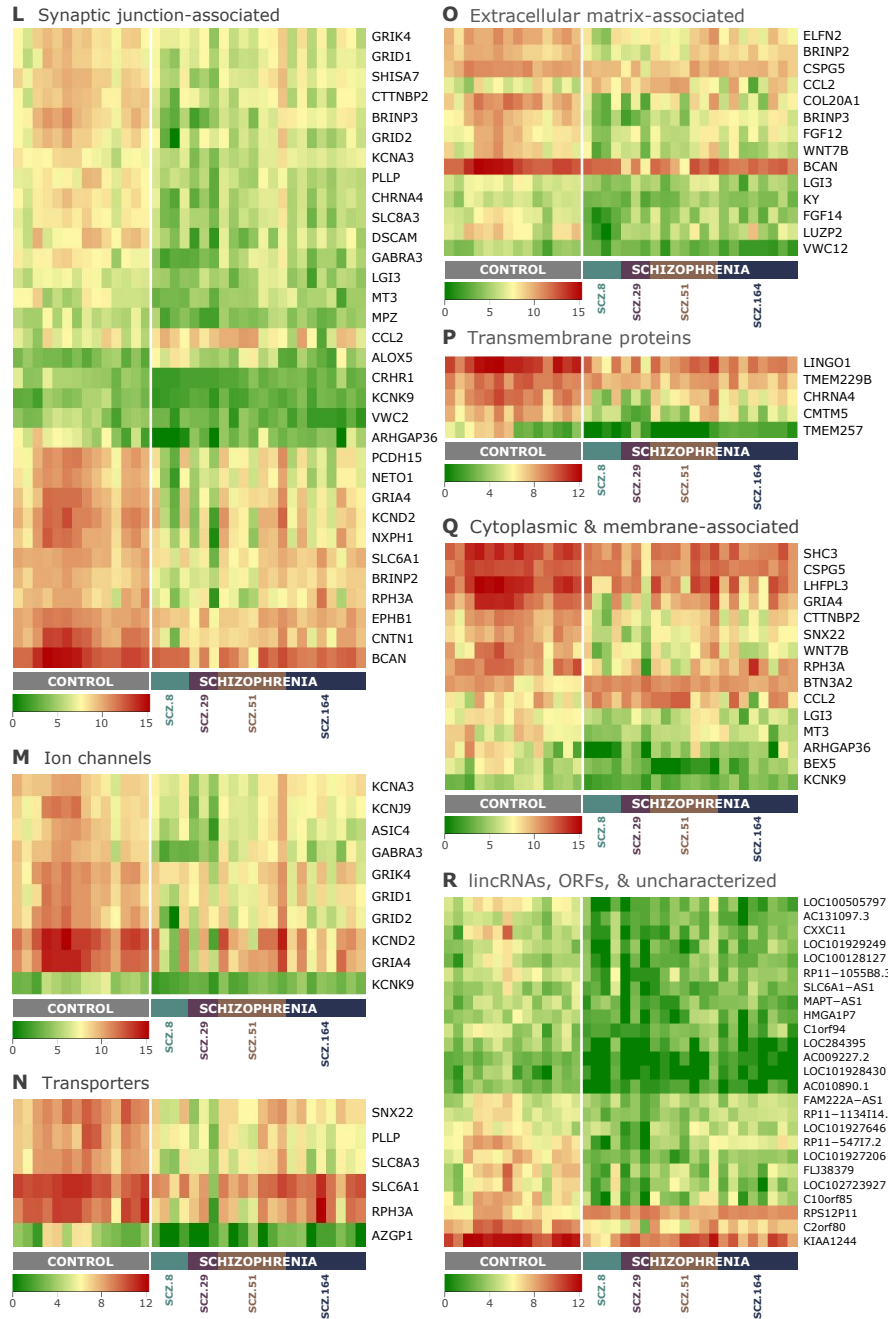

**Additional heat maps of significantly dysregulated genes in SCZ relative to control hGPCs**

As in **Figure S3**, expression patterns for genes differentially expressed by hiPSC GPCs derived from 4 SCZ patients, relative to the pooled gene expression pattern of hGPCs derived from 3 control-derived iPSCs (log<sub>2</sub>-fold change >1.0, FDR 5%, 118 genes total). As in **Figure S3**, which is derived from the same data set, each heat map visualizes UQ-normalized, log<sub>2</sub>-transformed counts of differentially expressed genes. These are grouped into the following functional categories, which follow those listed in **Figure S3**: **(L)** cell signaling and synaptic proteins; **(M)** ion channels; **(N)** transporters; **(O)** extracellular matrix constituents; **(P)** other transmembrane proteins; **(Q)** other cytoplasmic and membrane-bound proteins; and **(R)** unannotated genes, open reading frames, and long intergenic non-coding RNAs.

**Figure S5** (related to Figure 5)

**Neurexin-1 expression was suppressed in SCZ hiPSC GPCs**

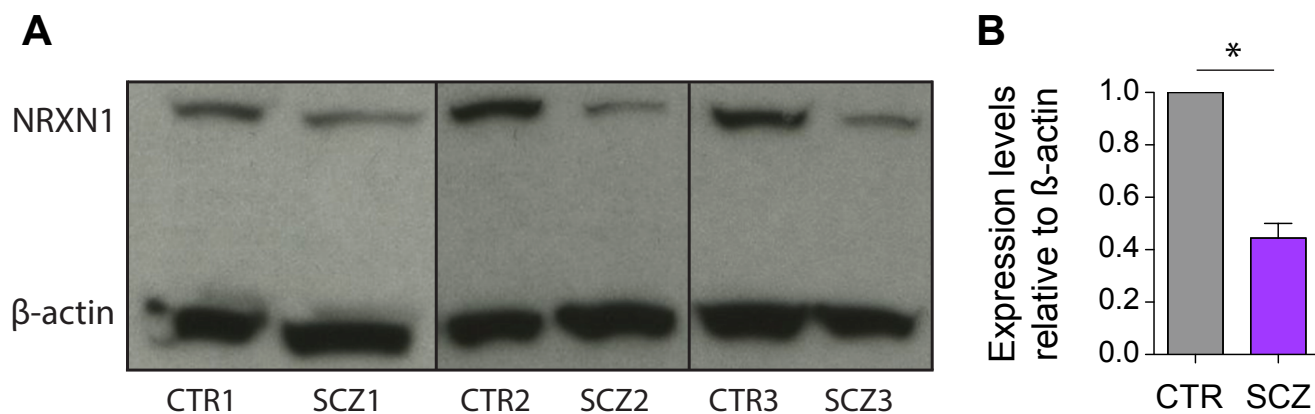

**A**, Western blots revealed that neurexin-1 protein was abundantly expressed by human GPCs purified by CD140a-directed FACS, and that neurexin-1 levels were lower in otherwise matched SCZ hGPCs (line 51 SCZ hGPCs vs. line 22 CTRL hGPCs). **B**, Quantitative densitometry revealed the significant decrease in neurexin1 protein expression by SCZ hGPCs relative to their CTR hGPCs. \* $p < 0.05$ , Student's t-test.

## SUPPLEMENTARY TABLES

Table S1 (related to Figure 1)

### Patients and cell lines used in this study

| Subject number                | hiPSC Line(s) | Age of subject | Gender | Ethnicity | RNA-Seq of CD140a <sup>+</sup> GPCs | Anatomic assessment N=shiverer mice | Behavioral assessment N=myelin w/t mice |
|-------------------------------|---------------|----------------|--------|-----------|-------------------------------------|-------------------------------------|-----------------------------------------|
| <b>Control Subjects</b>       |               |                |        |           |                                     |                                     |                                         |
| <b>Cntrl 1</b>                | <b>19, 22</b> | 26             | M      | C         | √                                   | √                                   | √                                       |
| <b>Cntrl 2</b>                | <b>37</b>     | 32             | F      | AA        | √                                   | √                                   | √                                       |
| <b>Cntrl 3</b>                | <b>205</b>    | 25             | M      | C         | √                                   | √                                   | √                                       |
| <b>Cntrl 4</b>                | <b>C27</b>    | NA             | NA     | NA        | √                                   | √                                   |                                         |
| <b>Schizophrenic Subjects</b> |               |                |        |           |                                     |                                     |                                         |
| <b>SCZ 1</b>                  | <b>8</b>      | 10             | F      | C         | √                                   | √                                   |                                         |
| <b>SCZ 2</b>                  | <b>51, 52</b> | 16             | M      | C         | √                                   | √                                   | √                                       |
| <b>SCZ 3</b>                  | <b>29, 31</b> | 12             | M      | C         | √                                   |                                     | √                                       |
| <b>SCZ 4</b>                  | <b>164</b>    | 14             | F      | AA        | √                                   | √                                   |                                         |
| <b>SCZ 5</b>                  | <b>193</b>    | 15             | F      | NA        |                                     | √                                   | √                                       |

A total of 11 new independent iPS cell lines were derived from 8 subjects; 5 juvenile-onset schizophrenic patients and 3 healthy controls; an established control line (C27) from an additional normal subject was published previously (Chambers et al., 2009; Wang et al., 2013), and graciously provided by L. Studer. hGPCs derived from these cells were assigned to individual experiments as noted. C, Caucasian; AA, African-American; NA, not available.



**Table S2 (related to Figure 4)****Significantly dysregulated genes in schizophrenic relative to control GPCs**

These tables list shared genes differentially expressed by hiPSC GPCs derived from 4 SCZ patients, relative to the pooled gene expression pattern of hGPCs from 3 control-derived iPSCs (log<sub>2</sub> fold change >1.0, FDR 5%, 116 genes total, *red*, upregulated in SCZ vs CTRL; *green*, downregulated in SCZ GPCs). The fold- changes (FC) and FDR-adjusted *p* values shown here were derived from the comparison of the pooled SCZ-derived GPC lines to the pooled control-derived GPC lines. Dysregulated genes were grouped into functional sets by their cellular roles and localizations.

Gene ID      Log<sub>2</sub> FC      P Value      Entrez Gene Name

**Transcription regulators, & nucleus-associated (10 genes)**

|        |        |          |                                                |
|--------|--------|----------|------------------------------------------------|
| SLFN13 | 2.832  | 2.18E-13 | schlafen family member 13                      |
| SLFN11 | 2.193  | 6.47E-09 | schlafen family member 11                      |
| NLRP2  | -7.208 | 4.24E-58 | NLR family, pyrin domain containing 2          |
| SOX10  | -4.448 | 8.37E-19 | SRY-box 10                                     |
| NR0B1  | -3.321 | 5.92E-27 | nuclear receptor subfamily 0 group B member 1  |
| OLIG2  | -3.196 | 4.23E-19 | oligodendrocyte lineage transcription factor 2 |
| OLIG1  | -3.146 | 5.72E-22 | oligodendrocyte transcription factor 1         |
| ZNF439 | -2.139 | 6.14E-08 | zinc finger protein 439                        |
| IRX1   | -1.815 | 5.52E-06 | iroquois homeobox 1                            |
| ZNF488 | -1.464 | 4.44E-07 | zinc finger protein 488                        |

**Glial differentiation (5 genes)**

|       |        |          |                                                |
|-------|--------|----------|------------------------------------------------|
| SOX10 | -4.448 | 8.37E-19 | SRY-box 10                                     |
| OLIG2 | -3.196 | 4.23E-19 | oligodendrocyte lineage transcription factor 2 |
| OLIG1 | -3.146 | 5.72E-22 | oligodendrocyte transcription factor 1         |
| DLL3  | -2.352 | 2.09E-24 | delta-like 3 (Drosophila)                      |
| MPZ   | -2.105 | 7.66E-13 | myelin protein zero                            |

**Myelination-associated (12 genes)**

|         |        |          |                                                              |
|---------|--------|----------|--------------------------------------------------------------|
| SOX10   | -4.448 | 8.37E-19 | SRY-box 10                                                   |
| GPR17   | -3.357 | 1.94E-10 | G protein-coupled receptor 17                                |
| UGT8    | -3.250 | 4.36E-09 | UDP glycosyltransferase 8                                    |
| OLIG2   | -3.196 | 4.23E-19 | oligodendrocyte lineage transcription factor 2               |
| GAL3ST1 | -2.681 | 4.01E-12 | galactose-3-O-sulfotransferase 1                             |
| CNTN1   | -2.675 | 5.65E-15 | contactin 1                                                  |
| PLLP    | -2.581 | 1.21E-24 | plasmalipin                                                  |
| OMG     | -2.561 | 5.09E-12 | oligodendrocyte myelin glycoprotein                          |
| FA2H    | -2.440 | 4.45E-08 | fatty acid 2-hydroxylase                                     |
| SLC8A3  | -2.224 | 2.00E-12 | solute carrier family 8 (sodium/calcium exchanger), member 3 |
| MPZ     | -2.105 | 7.66E-13 | myelin protein zero                                          |
| ZNF488  | -1.464 | 4.44E-07 | zinc finger protein 488                                      |

**Wnt signaling (4 genes)**

|         |        |          |                                                      |
|---------|--------|----------|------------------------------------------------------|
| WNT7B   | -2.626 | 1.46E-07 | wingless-type MMTV integration site family member 7B |
| PCDH15  | -2.530 | 1.42E-10 | protocadherin-related 15                             |
| PCDH11X | -2.364 | 1.25E-08 | protocadherin 11 X-linked                            |
| CDH10   | -1.646 | 9.33E-07 | cadherin 10                                          |

**Enzymes (15 genes)**

|         |        |          |                                                  |
|---------|--------|----------|--------------------------------------------------|
| SLFN13  | 2.832  | 2.18E-13 | schlafen family member 13                        |
| SLFN11  | 2.193  | 6.47E-09 | schlafen family member 11                        |
| HS3ST4  | 2.149  | 1.44E-04 | heparan sulfate-glucosamine 3-sulfotransferase 4 |
| ALOX5   | 1.777  | 2.35E-05 | arachidonate 5-lipoxygenase                      |
| CA10    | -3.550 | 3.07E-08 | carbonic anhydrase X                             |
| NEU4    | -3.361 | 8.31E-40 | neuraminidase 4 (sialidase)                      |
| UGT8    | -3.250 | 4.36E-09 | UDP glycosyltransferase 8                        |
| GAL3ST1 | -2.681 | 4.01E-12 | galactose-3-O-sulfotransferase 1                 |
| CNTN1   | -2.675 | 5.65E-15 | contactin 1                                      |
| CSMD3   | -2.560 | 5.78E-10 | CUB and Sushi multiple domains 3                 |
| GALNT13 | -2.467 | 2.80E-11 | polypeptide N-acetylgalactosaminyltransferase 13 |
| FA2H    | -2.440 | 4.45E-08 | fatty acid 2-hydroxylase                         |
| AOAH    | -2.271 | 2.99E-12 | acyloxyacyl hydrolase                            |
| KIF19   | -1.644 | 5.10E-06 | kinesin family member 19                         |
| DSEL    | -1.151 | 1.35E-10 | dermatan sulfate epimerase-like                  |

**Lipid & lipoprotein metabolism (5 genes)**

|         |        |          |                                    |
|---------|--------|----------|------------------------------------|
| ALOX5   | 1.777  | 2.35E-05 | arachidonate 5-lipoxygenase        |
| NEU4    | -3.361 | 8.31E-40 | neuraminidase 4 (sialidase)        |
| GAL3ST1 | -2.681 | 4.01E-12 | galactose-3-O-sulfotransferase 1   |
| PLPPR1  | -2.652 | 1.16E-09 | phospholipid phosphatase related 1 |
| PLPPR5  | -1.573 | 1.69E-09 | phospholipid phosphatase related 5 |



### Kinases & phosphatases (6 genes)

|          |        |          |                                                 |
|----------|--------|----------|-------------------------------------------------|
| PTPRT    | 4.410  | 1.69E-17 | protein tyrosine phosphatase, receptor type T   |
| PPP1R16B | -2.665 | 1.29E-09 | protein phosphatase 1 regulatory subunit 16B    |
| PPAPDC1A | -2.357 | 6.76E-09 | phospholipid phosphatase 4                      |
| DGKG     | -2.306 | 9.29E-12 | diacylglycerol kinase gamma                     |
| EPHB1    | -1.344 | 3.89E-17 | EPH receptor B1                                 |
| PNCK     | -1.226 | 4.25E-08 | pregnancy up-regulated nonubiquitous CaM kinase |

### Adhesion molecules (5 genes)

|       |        |          |                                                    |
|-------|--------|----------|----------------------------------------------------|
| DSCAM | -3.148 | 1.58E-12 | Down syndrome cell adhesion molecule               |
| ASTN2 | -2.242 | 4.70E-21 | astrotactin 2                                      |
| OPCML | -2.099 | 7.87E-10 | opioid binding protein/cell adhesion molecule-like |
| BAI1  | -2.000 | 1.31E-12 | adhesion G protein-coupled receptor B1             |
| CDH10 | -1.646 | 9.33E-07 | cadherin 10                                        |

### GPCR signaling (10 genes)

|        |        |          |                                                      |
|--------|--------|----------|------------------------------------------------------|
| CCL2   | 1.832  | 1.97E-07 | chemokine (C-C motif) ligand 2                       |
| GPR17  | -3.357 | 1.94E-10 | G protein-coupled receptor 17                        |
| GPR45  | -2.895 | 2.95E-14 | G protein-coupled receptor 45                        |
| WNT7B  | -2.626 | 1.46E-07 | wingless-type MMTV integration site family member 7B |
| GPR139 | -2.589 | 1.32E-08 | G protein-coupled receptor 139                       |
| OMG    | -2.561 | 5.09E-12 | oligodendrocyte myelin glycoprotein                  |
| CRHR1  | -2.382 | 5.81E-12 | corticotropin releasing hormone receptor 1           |
| DGKG   | -2.306 | 9.29E-12 | diacylglycerol kinase gamma                          |
| BAI1   | -2.000 | 1.31E-12 | adhesion G protein-coupled receptor B1               |
| GPR123 | -1.807 | 1.76E-18 | adhesion G protein-coupled receptor A1               |

### Growth factors (3 genes)

|       |        |          |                                    |
|-------|--------|----------|------------------------------------|
| FGF14 | -2.021 | 5.14E-07 | fibroblast growth factor 14        |
| FGF12 | -1.988 | 5.47E-09 | fibroblast growth factor 12        |
| CSPG5 | -1.285 | 6.38E-17 | chondroitin sulfate proteoglycan 5 |

### Cytokines (2 genes)

|       |        |          |                                                    |
|-------|--------|----------|----------------------------------------------------|
| CCL2  | 1.832  | 1.97E-07 | chemokine (C-C motif) ligand 2                     |
| CMTM5 | -3.023 | 3.69E-15 | CKLF-like MARVEL transmembrane domain containing 5 |

### Synaptic-junction associated (32 genes)

|          |        |          |                                                                       |
|----------|--------|----------|-----------------------------------------------------------------------|
| CCL2     | 1.832  | 1.97E-07 | chemokine (C-C motif) ligand 2                                        |
| ALOX5    | 1.777  | 2.35E-05 | arachidonate 5-lipoxygenase                                           |
| BRINP3   | -3.433 | 4.70E-22 | bone morphogenetic protein/retinoic acid inducible neural-specific 3  |
| DSCAM    | -3.148 | 1.58E-12 | Down syndrome cell adhesion molecule                                  |
| KCND2    | -3.145 | 5.67E-11 | potassium channel, voltage gated Shal related subfamily D, member 2   |
| NXPH1    | -2.892 | 3.11E-15 | neurexophilin 1                                                       |
| CHRNA4   | -2.755 | 4.45E-14 | cholinergic receptor, nicotinic alpha 4                               |
| ARHGAP36 | -2.686 | 1.21E-05 | Rho GTPase activating protein 36                                      |
| CNTN1    | -2.675 | 5.65E-15 | contactin 1                                                           |
| NETO1    | -2.633 | 2.52E-12 | neuropilin and tolloid like 1                                         |
| PLLP     | -2.581 | 1.21E-24 | plasmolipin                                                           |
| PCDH15   | -2.530 | 1.42E-10 | protocadherin-related 15                                              |
| GRIA4    | -2.519 | 1.84E-09 | glutamate receptor, ionotropic, AMPA 4                                |
| BCAN     | -2.473 | 7.35E-32 | brevican                                                              |
| GABRA3   | -2.450 | 1.08E-12 | gamma-aminobutyric acid (GABA) A receptor, alpha 3                    |
| CRHR1    | -2.382 | 5.81E-12 | corticotropin releasing hormone receptor 1                            |
| SHISA7   | -2.302 | 1.43E-14 | shisa family member 7                                                 |
| SLC8A3   | -2.224 | 2.00E-12 | solute carrier family 8 (sodium/calcium exchanger), member 3          |
| MPZ      | -2.105 | 7.66E-13 | myelin protein zero                                                   |
| GRID2    | -2.055 | 3.65E-06 | glutamate receptor, ionotropic, delta 2                               |
| RPH3A    | -2.014 | 1.01E-06 | rabphilin 3A                                                          |
| VWC2     | -2.003 | 9.67E-13 | von Willebrand factor C domain containing 2                           |
| CTTNBP2  | -1.904 | 7.21E-08 | cortactin binding protein 2                                           |
| MT3      | -1.795 | 5.27E-09 | metallothionein 3                                                     |
| KCNA3    | -1.719 | 3.03E-12 | potassium channel, voltage gated shaker related subfamily A, member 3 |
| BRINP2   | -1.625 | 2.03E-12 | bone morphogenetic protein/retinoic acid inducible neural-specific 2  |
| LGI3     | -1.614 | 4.07E-08 | leucine-rich repeat LGI family member 3                               |
| SLC6A1   | -1.596 | 5.52E-11 | solute carrier family 6 (neurotransmitter transporter), member 1      |
| GRID1    | -1.562 | 7.61E-07 | glutamate receptor, ionotropic, delta 1                               |
| GRIK4    | -1.547 | 2.73E-07 | glutamate receptor, ionotropic, kainate 4                             |
| KCNK9    | -1.460 | 4.40E-06 | potassium channel, two pore domain subfamily K, member 9              |
| EPHB1    | -1.344 | 3.89E-17 | EPH receptor B1                                                       |

### Ion channels (10 genes)

|        |        |          |                                                                       |
|--------|--------|----------|-----------------------------------------------------------------------|
| KCND2  | -3.145 | 5.67E-11 | potassium channel, voltage gated Shal related subfamily D, member 2   |
| GRIA4  | -2.519 | 1.84E-09 | glutamate receptor, ionotropic, AMPA 4                                |
| GABRA3 | -2.450 | 1.08E-12 | gamma-aminobutyric acid (GABA) A receptor, alpha 3                    |
| ASIC4  | -2.321 | 4.13E-14 | acid sensing ion channel subunit family member 4                      |
| KCNJ9  | -2.187 | 2.85E-21 | potassium channel, inwardly rectifying subfamily J, member 9          |
| GRID2  | -2.055 | 3.65E-06 | glutamate receptor, ionotropic, delta 2                               |
| KCNA3  | -1.719 | 3.03E-12 | potassium channel, voltage gated shaker related subfamily A, member 3 |
| GRID1  | -1.562 | 7.61E-07 | glutamate receptor, ionotropic, delta 1                               |
| GRIK4  | -1.547 | 2.73E-07 | glutamate receptor, ionotropic, kainate 4                             |
| KCNK9  | -1.460 | 4.40E-06 | potassium channel, two pore domain subfamily K, member 9              |

### Transporters (6 genes)

|        |        |          |                                                                  |
|--------|--------|----------|------------------------------------------------------------------|
| AZGP1  | -3.323 | 1.66E-08 | alpha-2-glycoprotein 1, zinc-binding                             |
| PLLP   | -2.581 | 1.21E-24 | plasmolipin                                                      |
| SNX22  | -2.297 | 3.53E-20 | sorting nexin 22                                                 |
| SLC8A3 | -2.224 | 2.00E-12 | solute carrier family 8 (sodium/calcium exchanger), member 3     |
| RPH3A  | -2.014 | 1.01E-06 | rabphilin 3A                                                     |
| SLC6A1 | -1.596 | 5.52E-11 | solute carrier family 6 (neurotransmitter transporter), member 1 |

### Extracellular matrix-associated (14 genes)

|         |        |          |                                                                            |
|---------|--------|----------|----------------------------------------------------------------------------|
| CCL2    | 1.832  | 1.97E-07 | chemokine (C-C motif) ligand 2                                             |
| COL20A1 | -3.476 | 7.33E-14 | collagen, type XX, alpha 1                                                 |
| BRINP3  | -3.433 | 4.70E-22 | bone morphogenetic protein/retinoic acid inducible neural-specific 3       |
| WNT7B   | -2.626 | 1.46E-07 | wingless-type MMTV integration site family member 7B                       |
| BCAN    | -2.473 | 7.35E-32 | brevican                                                                   |
| FGF14   | -2.021 | 5.14E-07 | fibroblast growth factor 14                                                |
| VWC2    | -2.003 | 9.67E-13 | von Willebrand factor C domain containing 2                                |
| FGF12   | -1.988 | 5.47E-09 | fibroblast growth factor 12                                                |
| LUZP2   | -1.948 | 7.22E-06 | leucine zipper protein 2                                                   |
| ELFN2   | -1.943 | 1.47E-06 | extracellular Leu-rich repeat and fibronectin type III domain containing 2 |
| KY      | -1.873 | 2.41E-13 | kyphoscoliosis peptidase                                                   |
| BRINP2  | -1.625 | 2.03E-12 | bone morphogenetic protein/retinoic acid inducible neural-specific 2       |
| LG13    | -1.614 | 4.07E-08 | leucine-rich repeat LGI family member 3                                    |
| CSPG5   | -1.285 | 6.38E-17 | chondroitin sulfate proteoglycan 5                                         |

### Transmembrane proteins (5 genes)

|          |        |          |                                                    |
|----------|--------|----------|----------------------------------------------------|
| TMEM257  | -4.018 | 5.58E-23 | transmembrane protein 257                          |
| CMTM5    | -3.023 | 3.69E-15 | CKLF-like MARVEL transmembrane domain containing 5 |
| CHRNA4   | -2.755 | 4.45E-14 | cholinergic receptor, nicotinic alpha 4            |
| LINGO1   | -2.139 | 3.56E-14 | leucine-rich repeat and Ig domain containing 1     |
| TMEM229B | -1.187 | 7.76E-06 | transmembrane protein 229B                         |

### Cytoplasmic & membrane-associated (15 genes)

|          |        |          |                                                               |
|----------|--------|----------|---------------------------------------------------------------|
| CCL2     | 1.832  | 1.97E-07 | chemokine (C-C motif) ligand 2                                |
| BTN3A2   | 1.355  | 8.10E-20 | butyrophilin subfamily 3 member A2                            |
| BEX5     | -3.885 | 2.55E-21 | brain expressed X-linked 5                                    |
| ARHGAP36 | -2.686 | 1.21E-05 | Rho GTPase activating protein 36                              |
| WNT7B    | -2.626 | 1.46E-07 | wingless-type MMTV integration site family member 7B          |
| GRIA4    | -2.519 | 1.84E-09 | glutamate receptor, ionotropic, AMPA 4                        |
| SNX22    | -2.297 | 3.53E-20 | sorting nexin 22                                              |
| LHFPL3   | -2.250 | 1.71E-07 | lipoma HMGIC fusion partner-like 3                            |
| RPH3A    | -2.014 | 1.01E-06 | rabphilin 3A                                                  |
| CTTNBP2  | -1.904 | 7.21E-08 | cortactin binding protein 2                                   |
| SHC3     | -1.830 | 7.88E-19 | SHC (Src homology 2 domain containing) transforming protein 3 |
| MT3      | -1.795 | 5.27E-09 | metallothionein 3                                             |
| LG13     | -1.614 | 4.07E-08 | leucine-rich repeat LGI family member 3                       |
| KCNK9    | -1.460 | 4.40E-06 | potassium channel, two pore domain subfamily K, member 9      |
| CSPG5    | -1.285 | 6.38E-17 | chondroitin sulfate proteoglycan 5                            |

### lincRNAs, ORFs, & uncharacterized (25 genes)

|                |        |          |                                                          |
|----------------|--------|----------|----------------------------------------------------------|
| RPS12P11       | 1.647  | 9.02E-30 | not available                                            |
| LOC101927206   | -3.592 | 2.74E-63 | not available                                            |
| LOC100505797   | -3.266 | 3.10E-27 | myosin heavy chain IB-like                               |
| C10orf85       | -3.081 | 3.52E-10 | long intergenic non-protein coding RNA 1561              |
| CXXC11         | -2.814 | 7.70E-19 | receptor (chemosensory) transporter protein 5 (putative) |
| LOC284395      | -2.792 | 1.20E-10 | uncharacterized LOC284395                                |
| RP11-54717.2   | -2.779 | 4.81E-34 | not available                                            |
| AC009227.2     | -2.758 | 3.05E-13 | not available                                            |
| LOC101928430   | -2.691 | 5.56E-10 | not available                                            |
| FLJ38379       | -2.389 | 1.25E-15 | not available                                            |
| LOC102723927   | -2.363 | 7.74E-21 | uncharacterized LOC102723927                             |
| RP11-1055B8.3  | -2.336 | 1.02E-16 | not available                                            |
| AC131097.3     | -2.180 | 5.80E-16 | not available                                            |
| C1orf94        | -2.077 | 7.03E-11 | chromosome 1 open reading frame 94                       |
| HMGAI1P7       | -2.057 | 4.49E-09 | high mobility group AT-hook 1 pseudogene 7               |
| LOC101929249   | -2.003 | 1.52E-06 | uncharacterized LOC101929249                             |
| LOC101927646   | -2.001 | 1.22E-10 | uncharacterized LOC101927646                             |
| AC010890.1     | -1.937 | 3.53E-10 | not available                                            |
| C2orf80        | -1.924 | 6.74E-18 | chromosome 2 open reading frame 80                       |
| MAPT-AS1       | -1.844 | 5.40E-07 | MAPT antisense RNA 1                                     |
| LOC100128127   | -1.814 | 1.43E-09 | not available                                            |
| RP11-1134114.8 | -1.783 | 5.72E-22 | not available                                            |
| SLC6A1-AS1     | -1.706 | 1.31E-09 | SLC6A1 antisense RNA 1                                   |
| KIAA1244       | -1.643 | 1.63E-10 | ARFGEF family member 3                                   |
| FAM222A-AS1    | -1.297 | 1.10E-11 | FAM222A antisense RNA 1                                  |

**Table S3** (related to Figure 5)

**Significantly dysregulated synaptic genes in SCZ GPCs**

| Gene ID        | SCZ.08<br>vs. Pooled CTR |          | SCZ.29<br>vs. Pooled CTR |          | SCZ.51<br>vs. Pooled CTR |          | SCZ.164<br>vs. Pooled CTR |          | SCZ.08+29+51+164<br>vs. Pooled CTR |          |
|----------------|--------------------------|----------|--------------------------|----------|--------------------------|----------|---------------------------|----------|------------------------------------|----------|
|                | Log2 FC                  | P Value  | Log2 FC                  | P Value  | Log2 FC                  | P Value  | Log2 FC                   | P Value  | Log2 FC                            | P Value  |
| <b>DSCAML1</b> | -1.971                   | 8.83E-07 | -2.968                   | 1.31E-04 | -1.089                   | 8.32E-05 | NS                        | NS       | -0.982                             | 5.34E-08 |
| <b>LINGO1</b>  | -2.320                   | 3.29E-04 | -2.885                   | 2.26E-04 | -1.452                   | 3.36E-06 | -2.523                    | 9.19E-12 | -2.139                             | 3.56E-14 |
| <b>NLGN1</b>   | -1.249                   | 3.37E-04 | -1.014                   | 4.32E-02 | NS                       | NS       | -0.545                    | 3.88E-02 | -0.625                             | 3.15E-04 |
| <b>NLGN2</b>   | NS                       | NS       | -0.767                   | 1.74E-02 | -0.384                   | 3.01E-03 | -0.408                    | 1.47E-02 | -0.452                             | 3.37E-06 |
| <b>NLGN3</b>   | -0.563                   | 3.98E-02 | -1.669                   | 3.07E-03 | -1.011                   | 1.63E-09 | -0.958                    | 3.67E-05 | -1.143                             | 1.61E-19 |
| <b>NRP1</b>    | -1.362                   | 1.15E-03 | 1.409                    | 5.00E-04 | NS                       | NS       | NS                        | NS       | NS                                 | NS       |
| <b>NRP2</b>    | NS                       | NS       | 1.548                    | 2.07E-03 | NS                       | NS       | -0.733                    | 3.65E-02 | NS                                 | NS       |
| <b>NRXN1</b>   | -3.259                   | 5.93E-06 | -2.984                   | 5.55E-03 | -1.176                   | 1.35E-02 | NS                        | NS       | -1.161                             | 2.04E-04 |
| <b>NRXN2</b>   | NS                       | NS       | -2.179                   | 9.04E-06 | -1.252                   | 2.71E-11 | -0.720                    | 3.33E-03 | -1.102                             | 6.82E-17 |
| <b>NRXN3</b>   | 1.874                    | 1.60E-04 | NS                       | NS       | NS                       | NS       | 1.198                     | 1.20E-02 | 0.909                              | 6.89E-04 |
| <b>NTNG2</b>   | -0.874                   | 7.99E-03 | -1.814                   | 3.51E-04 | NS                       | NS       | NS                        | NS       | NS                                 | NS       |
| <b>NXPE3</b>   | NS                       | NS       | NS                       | NS       | NS                       | NS       | 0.410                     | 1.74E-02 | 0.248                              | 2.79E-02 |
| <b>NXPH1</b>   | -3.019                   | 3.98E-07 | -3.666                   | 1.84E-03 | -1.338                   | 1.06E-02 | -2.317                    | 2.46E-09 | -2.892                             | 3.11E-15 |
| <b>NXPH2</b>   | -2.288                   | 5.62E-04 | NS                       | NS       | NS                       | NS       | NS                        | NS       | NS                                 | NS       |
| <b>NXPH3</b>   | NS                       | NS       | -2.225                   | 1.49E-03 | -1.084                   | 7.92E-03 | NS                        | NS       | -0.675                             | 2.66E-02 |
| <b>NXPH4</b>   | -2.186                   | 5.96E-03 | 4.095                    | 4.08E-14 | NS                       | NS       | -1.560                    | 1.09E-02 | NS                                 | NS       |
| <b>PTPRZ1</b>  | NS                       | NS       | -2.967                   | 2.60E-05 | -0.792                   | 4.13E-03 | -0.870                    | 5.38E-03 | -1.296                             | 2.41E-11 |
| <b>RGS4</b>    | -1.982                   | 6.80E-05 | 2.184                    | 3.97E-04 | 1.105                    | 7.04E-04 | -1.419                    | 2.64E-03 | NS                                 | NS       |
| <b>SLITRK2</b> | -6.812                   | 1.35E-04 | NS                       | NS       | -7.307                   | 7.51E-25 | -9.321                    | 5.54E-06 | -6.138                             | 5.52E-14 |
| <b>SLITRK3</b> | -2.958                   | 2.68E-03 | NS                       | NS       | -1.698                   | 6.37E-04 | -3.490                    | 1.61E-11 | -2.502                             | 6.76E-07 |
| <b>SLITRK4</b> | -4.157                   | 7.12E-05 | NS                       | NS       | -3.713                   | 5.02E-05 | -2.678                    | 1.20E-02 | -2.457                             | 5.86E-05 |
| <b>SLITRK5</b> | -2.047                   | 3.87E-07 | NS                       | NS       | -1.184                   | 1.54E-06 | -1.734                    | 9.31E-08 | -1.152                             | 1.05E-08 |
| <b>SPARCL1</b> | -2.314                   | 6.14E-06 | NS                       | NS       | NS                       | NS       | -0.843                    | 3.87E-02 | NS                                 | NS       |
| <b>TNR</b>     | -3.082                   | 8.83E-06 | -5.108                   | 1.89E-07 | -2.227                   | 8.81E-13 | NS                        | NS       | -2.137                             | 5.56E-12 |

Genomic analysis of SCZ-derived hGPCs from 4 different patients revealed the significant and shared down-regulation in these cells of a number of synaptic genes, including neuroligin-3, neuroexophilin-1, LINGO1 and DSCAML1, relative to their normal controls (*red*, upregulated in SCZ vs CTRL; *green*, downregulated in SCZ GPCs; color intensity proportionate to differential dysregulation). Other synapse-associated genes, such as the SLITRKs 2-5, were significantly and sharply downregulated in GPCs derived from 3 of the 4 patients (lines 8, 51 and 164).

Lines 08, 29, 51 and 164: schizophrenia-derived, different patients; pooled controls, 3 lines, each from a different patient. Individual SCZ line data shown as well as pooled SCZ data, to highlight both commonalities and distinctions between SCZ GPCs derived from different patients. Log2FC: log<sub>2</sub> fold-change in expression. NS: not significant.
